# Supplementary material
Source: PubMed Central journal article supplement (PMC2753403)
Supplement: NIHMS104931-supplement-1_si_001.pdf [file NIHMS104931-supplement-1_si_001.pdf]

**Supporting Information**

Lipophilic Bisphosphonates as Dual Farnesyl/Geranylgeranyl Diphosphate  
Synthase Inhibitors: An X-ray and NMR investigation

By

Yonghui Zhang<sup>1</sup>, Rong Cao<sup>2</sup>, Fenglin Yin<sup>2</sup>, Michael P. Hudock<sup>2</sup>, Rey-Ting Guo<sup>3</sup>, Kilannin  
Krysiak<sup>1</sup>, Sujoy Mukherjee<sup>2</sup>, Yi-Gui Gao<sup>1</sup>, Howard Robinson<sup>4</sup>, Yongcheng Song<sup>1</sup>,  
Joo Hwan No<sup>2</sup>, Kyle Bergan<sup>1</sup>, Annette Leon<sup>2</sup>, Lauren Cass<sup>1</sup>, Amanda Goddard<sup>1</sup>, Ting-Kai  
Chang<sup>1</sup>, Fu-Yang Lin<sup>2</sup>, Ermond Van Beek<sup>5</sup>, Socrates Papapoulos<sup>5</sup>, Andrew H.-J. Wang<sup>3</sup>,  
Tadahiko Kubo<sup>6</sup>, Mitsuo Ochi<sup>6</sup>, Dushyant Mukkamala<sup>2</sup> and Eric Oldfield<sup>1,2</sup>

<sup>1</sup>Department of Chemistry, University of Illinois at Urbana-Champaign, 600 South Mathews  
Avenue, Urbana, Illinois 61801;

<sup>2</sup>Center for Biophysics and Computational Biology, 607 South Mathews Avenue, Urbana,  
Illinois 61801;

<sup>3</sup>The Genomics Research Center, Academia Sinica, 128 Academia Road, Section 2, Nankang,  
Taipei, 115, Taiwan;

<sup>4</sup>Department of Biology, Brookhaven National Laboratory, Upton, New York 11973

<sup>5</sup>Department of Endocrinology, and Metabolic Diseases, Leiden University Medical Center,  
Leiden, The Netherlands;

<sup>6</sup>Department of Orthopedic Surgery, Graduate School of Biomedical Sciences, Hiroshima  
University, 1-2-3 Kasumi, Minami-ku, Hiroshima 734-8551, Japan.

## Supplementary Tables

**Table S1:** pIC<sub>50</sub> values for tumor cell growth inhibition and FPPS, GGPPS enzyme inhibition

| Compound <sup>a</sup> | Experimental Values            |                                 |       |                                         |                                         |                                            | Predicted Values <sup>b</sup>                      |                                                   |                                                         |  |
|-----------------------|--------------------------------|---------------------------------|-------|-----------------------------------------|-----------------------------------------|--------------------------------------------|----------------------------------------------------|---------------------------------------------------|---------------------------------------------------------|--|
|                       | FPPS<br>pK <sub>i</sub><br>(M) | GGPPS<br>pK <sub>i</sub><br>(M) | SlogP | SF-268<br>pIC <sub>50</sub><br>(M)(exp) | MCF-7<br>pIC <sub>50</sub><br>(M) (exp) | NCI-H460<br>pIC <sub>50</sub><br>(M) (exp) | pIC <sub>50</sub> (M)<br>SF-268 pred<br>(residual) | pIC <sub>50</sub> (M)<br>MCF-7 pred<br>(residual) | pIC <sub>50</sub> (M)<br>NCI-H460<br>pred<br>(residual) |  |
| 716                   | 5.8                            | 7.1                             | -0.4  | 7.9                                     | 6.4                                     | 8.3                                        | 6.4 (1.5)                                          | 5.6 (0.8)                                         | 6.7 (1.6)                                               |  |
| 715                   | 7.3                            | 8.1                             | -1.2  | 7.0                                     | 6.7                                     | 7.2                                        | 6.5 (0.5)                                          | 6.6 (0.1)                                         | 6.7 (0.5)                                               |  |
| 638                   | 7.8                            | 8.0                             | -1.1  | 6.7                                     | 6.8                                     | 6.8                                        | 6.4 (0.3)                                          | 6.3 (0.5)                                         | 6.5 (0.3)                                               |  |
| 722                   | 8.9                            | 7.2                             | -2.4  | 6.0                                     | 5.6                                     | 6.3                                        | 5.6 (0.4)                                          | 5.0 (0.6)                                         | 5.7 (0.6)                                               |  |
| 717                   | 7.7                            | 7.7                             | -1.8  | 6.2                                     | 6.3                                     | 6.2                                        | 6.2 (0.0)                                          | 5.4 (0.9)                                         | 6.3 (-0.1)                                              |  |
| 694                   | 7.1                            | 7.4                             | -0.1  | 5.9                                     | 4.9                                     | 6.0                                        | 6.6 (-0.7)                                         | 4.9 (0.0)                                         | 6.8 (-0.8)                                              |  |
| 604                   | 8.9                            | 7.3                             | -2.4  | 5.8                                     | 5.3                                     | 6.0                                        | 5.8 (0.0)                                          | 5.3 (0.0)                                         | 5.9 (0.1)                                               |  |
| 637                   | 8.9                            | 7.4                             | -2.5  | 5.9                                     | 6.6                                     | 5.7                                        | 5.5 (0.4)                                          | 5.6 (1.0)                                         | 5.6 (0.1)                                               |  |
| 688                   | 8.6                            | 7.5                             | -0.8  | 5.6                                     | 5.2                                     | 5.5                                        | 6.1 (-0.5)                                         | 5.0 (0.2)                                         | 6.3 (-0.8)                                              |  |
| 675                   | 5.9                            | 7.1                             | -0.2  | 5.2                                     | 5.2                                     | 5.3                                        | 4.9 (0.3)                                          | 5.6 (-0.4)                                        | 4.9 (0.4)                                               |  |
| 683                   | 8.5                            | 7.0                             | -2.4  | 4.9                                     | 4.7                                     | 4.8                                        | 5.0 (-0.1)                                         | 4.6 (0.1)                                         | 5.0 (-0.2)                                              |  |
| 261                   | 8.9                            | 5.5                             | -4.7  | 4.9                                     | 4.8                                     | 4.8                                        | 4.1 (0.8)                                          | 4.3 (0.5)                                         | 4.2 (0.6)                                               |  |
| 91                    | 8.9                            | 5.6                             | -5.5  | 4.8                                     | 4.7                                     | 4.8                                        | 3.8 (1.0)                                          | 4.6 (0.1)                                         | 3.8 (1.0)                                               |  |
| 678                   | 7.9                            | 5.7                             | -9.0  | 4.6                                     | 4.7                                     | 4.7                                        | 4.4 (0.2)                                          | 4.5 (0.2)                                         | 4.4 (0.3)                                               |  |
| 754                   | 5.3                            | 7.8                             | -0.9  | 4.6                                     | 4.6                                     | 4.7                                        | 5.2 (-0.6)                                         | 5.2 (-0.6)                                        | 5.2 (-0.5)                                              |  |
| 728                   | 6.8                            | 7.5                             | -1.5  | 4.9                                     | 4.5                                     | 4.6                                        | 5.3 (-0.4)                                         | 5.7 (-1.2)                                        | 5.4 (-0.8)                                              |  |
| 300                   | 8.3                            | 6.4                             | -3.8  | 4.5                                     | 4.4                                     | 4.5                                        | 4.8 (-0.3)                                         | 4.7 (-0.3)                                        | 4.9 (-0.4)                                              |  |
| 679                   | 8.2                            | 5.0                             | -5.0  | 4.5                                     | 4.4                                     | 4.3                                        | 4.8 (-0.3)                                         | 4.0 (0.4)                                         | 4.8 (-0.5)                                              |  |
| 472                   | 8.6                            | 6.6                             | -3.1  | 4.3                                     | 4.4                                     | 4.3                                        | 4.9 (-0.6)                                         | 4.8 (-0.4)                                        | 4.9 (-0.6)                                              |  |
| 474                   | 8.4                            | 5.8                             | -4.4  | 4.1                                     | 4.1                                     | 4.2                                        | 4.3 (-0.2)                                         | 4.5 (-0.4)                                        | 4.3 (-0.1)                                              |  |
| 278                   | 8.6                            | 5.4                             | -5.4  | 4.3                                     | 4.1                                     | 4.1                                        | 4.5 (-0.2)                                         | 4.1 (0.0)                                         | 4.6 (-0.5)                                              |  |
| 483                   | 8.5                            | 5.5                             | -3.9  | 4.0                                     | 4.0                                     | 4.1                                        | 3.8 (0.2)                                          | 4.3 (-0.3)                                        | 3.8 (0.3)                                               |  |
| 5                     | 7.4                            | 5.3                             | -7.0  | 3.5                                     | 3.9                                     | 4.0                                        | 4.1 (-0.6)                                         | 3.9 (0.0)                                         | 4.1 (-0.1)                                              |  |
| 685                   | 8.3                            | 5.7                             | -4.3  | 3.7                                     | 3.6                                     | 3.9                                        | 3.3 (0.4)                                          | 3.5 (0.1)                                         | 3.2 (0.7)                                               |  |
| 684                   | 8.0                            | 6.6                             | -3.6  | 3.7                                     | 3.6                                     | 3.8                                        | 4.2 (-0.5)                                         | 4.4 (-0.8)                                        | 4.2 (-0.4)                                              |  |
| 2                     | 8.6                            | 5.0                             | -5.0  | 3.9                                     | 3.8                                     | 3.7                                        | 3.8 (0.1)                                          | 4.1 (-0.3)                                        | 3.8 (-0.1)                                              |  |
| 24                    | 8.3                            | 5.6                             | -5.6  | 3.8                                     | 3.7                                     | 3.7                                        | 3.6 (0.2)                                          | 3.4 (0.3)                                         | 3.6 (0.1)                                               |  |
| 1                     | 7.2                            | 4.9                             | -6.7  | 3.5                                     | 3.3                                     | 3.5                                        | 4.1 (-0.6)                                         | 3.0 (0.3)                                         | 4.2 (-0.7)                                              |  |
| 727                   | 8.2                            | 5.6                             | -3.8  | 3.7                                     | 3.5                                     | 3.5                                        | 3.9 (-0.2)                                         | 3.8 (-0.3)                                        | 3.9 (-0.4)                                              |  |

<sup>a</sup> Chemical structures are shown in Figure S1 in the Supporting Information.

<sup>b</sup> Predicted values from leave-two-out cross validated models

This Table shows a compilation of enzyme (human FPPS, human GGPPS) inhibition data by a series of bisphosphonates together with computed SlogP values. The experimental pIC<sub>50</sub> = -log<sub>10</sub>IC<sub>50</sub>[M] values are shown for all three cell lines. We also show the predicted (pred) pIC<sub>50</sub> values from the combinatorial descriptor search and their residuals. The exp vs. pred R<sup>2</sup> value for MCF-7 is 0.78. For NCI-H460 the R<sup>2</sup> value was 0.77, for SF-268, the R<sup>2</sup> was 0.78. Full details are in Table S2-S4.

**Table S2:** Top ten “enzyme plus 2-descriptor” combinations with their coefficients and relative contribution for the MCF-7 tumor cell pIC<sub>50</sub> predictions.

| MCF7<br>pIC <sub>50</sub> (cell) =                                                       | R <sup>2</sup> | Relative Importance<br>of pIC <sub>50</sub> (enzyme) | Relative Importance<br>of Descriptor B | Relative<br>Importance of<br>Descriptor C |
|------------------------------------------------------------------------------------------|----------------|------------------------------------------------------|----------------------------------------|-------------------------------------------|
| 25.59107<br>+0.74764 * GGPPS_pIC50<br>-9.24972 * BCUT_PEOE_3<br>-0.07518 * dipoleY       | 0.77530        | 1.000000                                             | 0.543553                               | 0.451504                                  |
| -0.37197<br>+0.53975 * GGPPS_pIC50<br>-0.09607 * E_tor<br>+1.48546 * FCASA+              | 0.75706        | 0.573256                                             | 1.000000                               | 0.990688                                  |
| 1.60321<br>+0.55960 * GGPPS_pIC50<br>+0.01527 * SMR_VSA5<br>-0.39560 * chi1_C            | 0.75231        | 0.450542                                             | 1.000000                               | 0.829762                                  |
| -6.36382<br>+0.98141 * GGPPS_pIC50<br>-7.96387 * GCUT_PEOE_1<br>+0.01284 * PEOE_VSA_POS  | 0.75219        | 1.000000                                             | 0.816069                               | 0.567343                                  |
| 1.77550<br>+0.63325 * GGPPS_pIC50<br>-0.24596 * chi0_C<br>+0.01308 * SMR_VSA5            | 0.74559        | 0.594899                                             | 0.864659                               | 1.000000                                  |
| 28.48149<br>+0.69807 * GGPPS_pIC50<br>-9.18802 * BCUT_SMR_3<br>-0.04966 * dipoleY        | 0.74409        | 1.000000                                             | 0.471052                               | 0.319424                                  |
| -7.69477<br>+1.23574 * GGPPS_pIC50<br>-6.92773 * GCUT_PEOE_1<br>+5.94612 * PEOE_VSA_FPOS | 0.74020        | 1.000000                                             | 0.563786                               | 0.287592                                  |
| -1.74865<br>+1.23574 * GGPPS_pIC50<br>-6.92773 * GCUT_PEOE_1<br>-5.94612 * PEOE_VSA_FNEG | 0.74020        | 1.000000                                             | 0.563786                               | 0.287592                                  |
| -1.84405<br>+0.91410 * GGPPS_pIC50<br>+0.01280 * SMR_VSA5<br>-0.50160 * logP(o/w)        | 0.73981        | 0.800331                                             | 0.911887                               | 1.000000                                  |
| 3.96512<br>+0.80121 * GGPPS_pIC50<br>+0.00015049 * pmi<br>-0.20002 * KierA1              | 0.73936        | 0.867746                                             | 0.887623                               | 1.000000                                  |

Table shows a compilation of the outputs of a combinatorial descriptor search that relates cell growth inhibition (pIC<sub>50</sub> (cell)) with GGPPS inhibition plus two other descriptors (B, C).

$$pIC_{50}(\text{cell}) = a \cdot pIC_{50}(\text{enzyme}) + b \cdot B + c \cdot C + d$$

where a-d are linear regression coefficient and B, C are chosen from 230 descriptors in MOE and FPPS. The explanation of the meanings of each of the top-10 descriptor sets are given in the MOE manual and ref. 19 in the Text. GGPPS inhibition is the dominant descriptor in most cases, consistent with the high correlation between GGPPS inhibition and cell growth inhibition.

The following gives a summary of the R<sup>2</sup> values based on the combinatorial descriptor search using the top-ranked combination.

| Target | Cell line | R <sup>2</sup> ,<br>Enzyme<br>vs. Cell | R <sup>2</sup> ,<br>Training<br>Set | R <sup>2</sup> ,<br>Test<br>Set <sup>a</sup> | Descriptors<br>used |
|--------|-----------|----------------------------------------|-------------------------------------|----------------------------------------------|---------------------|
| GGPPS  | MCF-7     | 0.60                                   | 0.78                                | 0.73                                         | 124                 |

<sup>a</sup> Predicted values from leave-two-out cross validated models.

**Table S3:** Top ten “enzyme plus 2-descriptor” combinations with their coefficients and relative contribution for the NCI-H460 tumor cell pIC<sub>50</sub> predictions.

| NCI-H460<br>pIC <sub>50</sub> (cell) =                                         | R <sup>2</sup> | Relative Importance<br>of pIC <sub>50</sub> (enzyme) | Relative Importance<br>of Descriptor B | Relative<br>Importance of<br>Descriptor C |
|--------------------------------------------------------------------------------|----------------|------------------------------------------------------|----------------------------------------|-------------------------------------------|
| 0.63207<br>+0.35568 * GGPPS_pIC50<br>-0.17238 * E_tor<br>+2.17209 * FCASA+     | 0.76741        | 0.210523                                             | 1.000000                               | 0.807295                                  |
| -2.35689<br>-0.06808 * FPPS_pIC50<br>-0.21578 * E_tor<br>+2.48428 * FCASA+     | 0.73463        | 0.030920                                             | 0.737612                               | 1.000000                                  |
| 3.60781<br>+0.58855 * GGPPS_pIC50<br>-0.30001 * dipole<br>+0.00033410 * pmiX   | 0.73343        | 0.345714                                             | 0.814374                               | 1.000000                                  |
| 2.58980<br>+0.07950 * GGPPS_pIC50<br>-0.14206 * E_tor<br>+0.00320 * CASA+      | 0.70560        | 0.057097                                             | 1.000000                               | 0.691306                                  |
| 2.27359<br>+0.08322 * FPPS_pIC50<br>-0.15750 * E_tor<br>+0.00355 * CASA+       | 0.70825        | 0.051781                                             | 0.691607                               | 1.000000                                  |
| 4.80220<br>+0.64764 * GGPPS_pIC50<br>-0.22230 * KierA1<br>+0.00023492 * pmi    | 0.70361        | 0.506213                                             | 0.802098                               | 1.000000                                  |
| -0.38230<br>+0.63201 * GGPPS_pIC50<br>+8.92630 * FASA+<br>-0.11496 * E_tor     | 0.70163        | 0.560943                                             | 0.869247                               | 1.000000                                  |
| 1.49330<br>+0.58087 * GGPPS_pIC50<br>+0.01907 * SMR_VSA5<br>-0.46209 * chi1_C  | 0.69768        | 0.374303                                             | 1.000000                               | 0.775735                                  |
| 3.08296<br>+0.55624 * GGPPS_pIC50<br>+0.00026177 * pmi<br>-0.23473 * dipole    | 0.69363        | 0.390173                                             | 1.000000                               | 0.760871                                  |
| -14.21073<br>+0.71487 * GGPPS_pIC50<br>+0.91522 * std_dim1<br>+6.50762 * a_ICM | 0.69336        | 0.530967                                             | 1.000000                               | 0.887648                                  |

Table shows a compilation of the outputs of a combinatorial descriptor search that relates cell growth inhibition (pIC<sub>50</sub> (cell)) with GGPPS inhibition plus two other descriptors (B, C).

$$pIC_{50}(\text{cell}) = a \cdot pIC_{50}(\text{enzyme}) + b \cdot B + c \cdot C + d$$

where a-d are linear regression coefficient and B, C are chosen from 230 descriptors in MOE and FPPS. The explanation of the meanings of each of the top-10 descriptor sets are given in the MOE manual and ref. 19 in the Text. GGPPS inhibition is the dominant descriptor in most cases, consistent with the high correlation between GGPPS inhibition and cell growth inhibition.

The following gives a summary of the R<sup>2</sup> values based on the combinatorial descriptor search using the top-ranked combination.

| Target | Cell line | R <sup>2</sup> ,<br>Enzyme<br>vs. Cell | R <sup>2</sup> ,<br>Training<br>Set | R <sup>2</sup> ,<br>Test<br>Set <sup>a</sup> | Descriptors<br>used |
|--------|-----------|----------------------------------------|-------------------------------------|----------------------------------------------|---------------------|
| GGPPS  | NCI-H460  | 0.54                                   | 0.77                                | 0.79                                         | 124                 |

<sup>a</sup> Predicted values from leave-two-out cross validated models.

**Table S4:** Top ten “enzyme plus 2-descriptor” combinations with their coefficients and relative contribution for the SF-268 tumor cell pIC<sub>50</sub> predictions.

| SF268<br>pIC <sub>50</sub> (cell) =                                            | R <sup>2</sup> | Relative Importance<br>of pIC <sub>50</sub> (enzyme) | Relative Importance<br>of Descriptor B | Relative<br>Importance of<br>Descriptor C |
|--------------------------------------------------------------------------------|----------------|------------------------------------------------------|----------------------------------------|-------------------------------------------|
| 0.68240<br>+0.37234 * GGPPS_pIC50<br>-0.15738 * E_tor<br>+2.01914 * FCASA+     | 0.78095        | 0.241393                                             | 0.821984                               | 1.000000                                  |
| 3.47134<br>+0.58562 * GGPPS_pIC50<br>-0.27717 * dipole<br>+0.00030471 * pmiX   | 0.74359        | 0.377170                                             | 0.824941                               | 1.000000                                  |
| 2.13378<br>-0.01874 * FPPS_pIC50<br>+2.38273 * FCASA+<br>-0.20582 * E_tor      | 0.73660        | 0.008925                                             | 1.000000                               | 0.741719                                  |
| 1.90577<br>+0.13816 * FPPS_pIC50<br>-0.15338 * E_tor<br>+0.00355 * CASA+       | 0.73530        | 0.088282                                             | 1.000000                               | 0.709317                                  |
| -0.34695<br>+0.62533 * GGPPS_pIC50<br>-0.10859 * E_tor<br>+8.73213 * FASA+     | 0.73198        | 0.587560                                             | 1.000000                               | 0.900202                                  |
| 1.65558<br>+0.53214 * GGPPS_pIC50<br>-0.43608 * chi1_C<br>+0.01838 * SMR_VSA5  | 0.72967        | 0.355866                                             | 0.759749                               | 1.000000                                  |
| -13.73343<br>+0.67360 * GGPPS_pIC50<br>+6.36295 * a_ICM<br>+0.89897 * std_dim1 | 0.72907        | 0.509358                                             | 0.883606                               | 1.000000                                  |
| 1.83409<br>+0.18619 * FPPS_pIC50<br>-0.10393 * E_tor<br>+0.04801 * E_vdw       | 0.72716        | 0.175579                                             | 1.000000                               | 0.762609                                  |
| 2.52273<br>+0.10480 * GGPPS_pIC50<br>-0.13127 * E_tor<br>+0.00303 * CASA+      | 0.72566        | 0.081452                                             | 1.000000                               | 0.708243                                  |
| 4.66691<br>+0.64895 * GGPPS_pIC50<br>-0.21304 * KierA1<br>+0.00021779 * pmi    | 0.72203        | 0.547122                                             | 0.829133                               | 1.000000                                  |

Table shows a compilation of the outputs of a combinatorial descriptor search that relates cell growth inhibition (pIC<sub>50</sub> (cell)) with GGPPS inhibition plus two other descriptors (B, C).

$$pIC_{50}(\text{cell}) = a \cdot pIC_{50}(\text{enzyme}) + b \cdot B + c \cdot C + d$$

where a-d are linear regression coefficient and B, C are chosen from 230 descriptors in MOE and FPPS. The explanation of the meanings of each of the top-10 descriptor sets are given in the MOE manual and ref. 19 in the Text. GGPPS inhibition is the dominant descriptor in most cases, consistent with the high correlation between GGPPS inhibition and cell growth inhibition.

The following gives a summary of the R<sup>2</sup> values based on the combinatorial descriptor search using the top-ranked combination.

| Target | Cell line | R <sup>2</sup> ,<br>Enzyme<br>vs. Cell | R <sup>2</sup> ,<br>Training<br>Set | R <sup>2</sup> ,<br>Test<br>Set <sup>a</sup> | Descriptors<br>used |
|--------|-----------|----------------------------------------|-------------------------------------|----------------------------------------------|---------------------|
| GGPPS  | SF-268    | 0.56                                   | 0.78                                | 0.66                                         | 124                 |

<sup>a</sup> Predicted values from leave-two-out cross validated models.



**Table S5:** Data collection and refinement statistics for BPH-461<sup>a</sup> bound to human FPPS.

(PDB: 2OPM)

| <b>Crystals</b>                                                                                                    | 461B <sup>a</sup>                |
|--------------------------------------------------------------------------------------------------------------------|----------------------------------|
| <b>Data collection</b>                                                                                             |                                  |
| Space group                                                                                                        | P4 <sub>1</sub> 2 <sub>1</sub> 2 |
| Unit cell dimension (Å)                                                                                            |                                  |
| <i>a</i> = <i>b</i> , <i>c</i> (Å)                                                                                 | 111.783, 66.525                  |
| X-ray source                                                                                                       | BNL-X29 <sup>b</sup>             |
| Wavelength (Å)                                                                                                     | 1.1                              |
| Resolution (Å)                                                                                                     | 30-2.40 (2.49-2.40)              |
| No. of reflection observed                                                                                         | 204,362                          |
| Unique                                                                                                             | 16,818 (1,525)                   |
| Completeness (%)                                                                                                   | 98.6 (92.0)                      |
| <i>R</i> -merge                                                                                                    | 0.100 (0.412)                    |
| <i>I</i> / $\sigma$ <i>I</i>                                                                                       | 42.0                             |
| Multiplicity                                                                                                       | 12.2 (9.2)                       |
| <b>Refinement statistics</b>                                                                                       |                                  |
| Resolution range (Å)                                                                                               | 30.0–2.40                        |
| <i>R</i> -work/ <i>R</i> -free (%)                                                                                 | 23.35/26.93                      |
| RMSD                                                                                                               |                                  |
| Bond lengths                                                                                                       | 0.004                            |
| Bond angles                                                                                                        | 1.532                            |
| No. of atoms                                                                                                       |                                  |
| Protein                                                                                                            | 2,708                            |
| Ligand                                                                                                             | 18                               |
| PO <sub>4</sub> <sup>3-</sup>                                                                                      | 10                               |
| Magnesium ion                                                                                                      | 3                                |
| Solvent (water)                                                                                                    | 130                              |
| <i>B</i> average (Å <sup>2</sup> ) of protein                                                                      | 51.20                            |
| <i>B</i> average (Å <sup>2</sup> ) of solvents                                                                     | 56.58                            |
| <i>B</i> average (Å <sup>2</sup> ) of ligands(Bisphosphonates,Mg <sup>2+</sup> and PO <sub>4</sub> <sup>3-</sup> ) | 68.93                            |

<sup>a</sup>: BPH-461 is 3-fluoro-1-(2-hydroxy-2,2-bisphosphonoethyl)-pyridinium<sup>b</sup>: Brookhaven National Laboratory**BPH-461**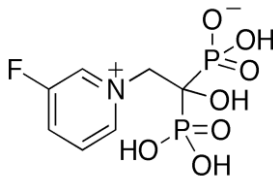

**Table S6:** Data collection and refinement statistics for BPH-461<sup>a</sup> bound to *T. brucei* FPPS (PDB: 3DYG).

|                                                                                  |                          |
|----------------------------------------------------------------------------------|--------------------------|
| <b>Crystals</b>                                                                  | 461B <sup>a</sup>        |
| <b>Data collection</b>                                                           |                          |
| Space group                                                                      | C2                       |
| Unit cell dimension (Å)                                                          |                          |
| <i>a</i> , <i>b</i> , <i>c</i> (Å)                                               | 135.565, 118.520, 63.186 |
| β(°)                                                                             | 112.364                  |
| X-ray source                                                                     | BNL-X8C <sup>b</sup>     |
| Wavelength (Å)                                                                   | 1.1                      |
| Resolution (Å)                                                                   | 30-2.10 (2.18-2.10)      |
| No. of reflection observed                                                       | 406,549                  |
| Unique                                                                           | 53,536 (5,267)           |
| Completeness (%)                                                                 | 99.1 (98.3)              |
| <i>R</i> -merge                                                                  | 0.098 (0.530)            |
| <i>I</i> /σ <i>I</i>                                                             | 28.0                     |
| Multiplicity                                                                     | 7.6 (7.6)                |
| Refinement statistics                                                            |                          |
| Resolution range (Å)                                                             | 30.0–2.10 (2.18-2.10)    |
| <i>R</i> -work/ <i>R</i> -free (%)                                               | 20.7/25.0 (25.8/33.0)    |
| RMSD                                                                             |                          |
| Bond lengths                                                                     | 0.008                    |
| Bond angles                                                                      | 1.24                     |
| No. of atoms                                                                     |                          |
| Protein                                                                          | 5,745                    |
| Bisphosphonates                                                                  | 36                       |
| Magnesium ion                                                                    | 6                        |
| Solvent (water)                                                                  | 561                      |
| <i>B</i> average (Å <sup>2</sup> ) of protein                                    | 28.42                    |
| <i>B</i> average (Å <sup>2</sup> ) of solvents                                   | 27.60                    |
| <i>B</i> average (Å <sup>2</sup> ) of ligands(Bisphosphonates,Mg <sup>2+</sup> ) | 36.22                    |

<sup>a</sup>: BPH-461 is 3-fluoro-1-(2-hydroxy-2,2-bisphosphonoethyl)-pyridinium

<sup>b</sup>: Brookhaven National Laboratory

### BPH-461

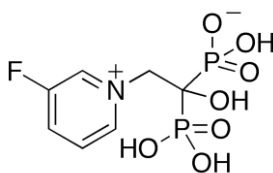

**Table S7:** Data collection and refinement statistics for BPH-461<sup>a</sup> and IPP bound to *T. brucei*

FPPS. (PDB: 3DYF)

|                                                                                      |                          |
|--------------------------------------------------------------------------------------|--------------------------|
| <b>Crystals</b>                                                                      | 461B <sup>a</sup>        |
| <b>Data collection</b>                                                               |                          |
| Space group                                                                          | C2                       |
| Unit cell dimension (Å)                                                              |                          |
| <i>a, b, c</i> (Å)                                                                   | 133.939, 117.898, 63.274 |
| $\beta$ (°)                                                                          | 112.364                  |
| X-ray source                                                                         | BNL-X8C <sup>b</sup>     |
| Wavelength (Å)                                                                       | 1.1                      |
| Resolution (Å)                                                                       | 30-2.65 (2.74-2.65)      |
| No. of reflection observed                                                           | 180,331                  |
| Unique                                                                               | 26,721 (2,681)           |
| Completeness (%)                                                                     | 100.0 (100.0)            |
| <i>R</i> -merge                                                                      | 0.135 (0.589)            |
| <i>I</i> / $\sigma$ <i>I</i>                                                         | 52.7                     |
| Multiplicity                                                                         | 6.7 (6.5)                |
| <b>Refinement statistics</b>                                                         |                          |
| Resolution range (Å)                                                                 | 30.0–2.65 (2.74-2.65)    |
| <i>R</i> -work/ <i>R</i> -free (%)                                                   | 20.3/26.9 (28.7/34.0)    |
| RMSD                                                                                 |                          |
| Bond lengths                                                                         | 0.006                    |
| Bond angles                                                                          | 1.10                     |
| No. of atoms                                                                         |                          |
| Protein                                                                              | 5,733                    |
| Bisphosphonates                                                                      | 36                       |
| Magnesium ion                                                                        | 6                        |
| Solvent (water)                                                                      | 298                      |
| <b>B</b> average (Å <sup>2</sup> ) of protein                                        | 28.42                    |
| <b>B</b> average (Å <sup>2</sup> ) of solvents                                       | 27.60                    |
| <b>B</b> average (Å <sup>2</sup> ) of ligands(Bisphosphonates,Mg <sup>2+</sup> ,IPP) | 36.22                    |

<sup>a</sup>: BPH-461 is 3-fluoro-1-(2-hydroxy-2,2-bisphosphonoethyl)-pyridinium<sup>b</sup>: Brookhaven National Laboratory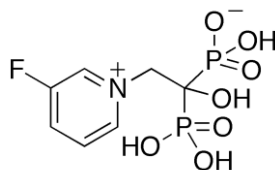**BPH-461**

**Table S8:** Data collection and refinement statistics for BPH-721<sup>a</sup> bound to *T. brucei* FPPS.

(PDB: 3DYH)

| <u>Crystals</u>                                                                  | 721 <sup>a</sup>         |
|----------------------------------------------------------------------------------|--------------------------|
| <u>Data collection</u>                                                           |                          |
| Space group                                                                      | C2                       |
| Unit cell dimension (Å)                                                          |                          |
| <i>a</i> , <i>b</i> , <i>c</i> (Å)                                               | 133.915, 118.733, 63.036 |
| β(°)                                                                             | 112.285                  |
| X-ray source                                                                     | BNL-X29 <sup>b</sup>     |
| Wavelength (Å)                                                                   | 1.1                      |
| Resolution (Å)                                                                   | 30-1.95 (2.02-1.95)      |
| No. of reflection observed                                                       | 496,958                  |
| Unique                                                                           | 65,909(5,898)            |
| Completeness (%)                                                                 | 98.8 (89.1)              |
| <i>R</i> -merge                                                                  | 0.097 (0.509)            |
| <i>I</i> /σ <i>I</i>                                                             | 17.8                     |
| Multiplicity                                                                     | 7.5 (5.3)                |
| Refinement statistics                                                            |                          |
| Resolution range (Å)                                                             | 30.0–1.95 (2.02-1.95)    |
| <i>R</i> -work/ <i>R</i> -free (%)                                               | 23.9/28.1 (29.4/35.6)    |
| RMSD                                                                             |                          |
| Bond lengths                                                                     | 0.011                    |
| Bond angles                                                                      | 1.3                      |
| No. of atoms                                                                     |                          |
| Protein                                                                          | 5,736                    |
| Bisphosphonates                                                                  | 42                       |
| Magnesium ion                                                                    | 6                        |
| Solvent (water)                                                                  | 349                      |
| <i>B</i> average (Å <sup>2</sup> ) of protein                                    | 45.80                    |
| <i>B</i> average (Å <sup>2</sup> ) of solvents                                   | 27.60                    |
| <i>B</i> average (Å <sup>2</sup> ) of ligands(Bisphosphonates,Mg <sup>2+</sup> ) | 30.60                    |

<sup>a</sup>: BPH-721 is 2-(3-butoxypyridinium-1-yl)ethylidene-1,1-bisphosphonic acid

<sup>b</sup>: Brookhaven National Laboratory

**BPH-721**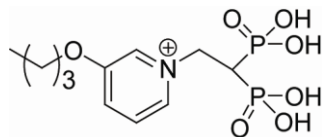

**Table S9:** Data collection and refinement statistics for BPH-722<sup>a</sup> bound to *T. brucei* FPPS

(3EGT).

| <u>Crystals</u>                                                                  | 722 <sup>a</sup>         |
|----------------------------------------------------------------------------------|--------------------------|
| <u>Data collection</u>                                                           |                          |
| Space group                                                                      | C2                       |
| Unit cell dimension (Å)                                                          |                          |
| <i>a</i> , <i>b</i> , <i>c</i> (Å)                                               | 133.227, 119.153, 62.957 |
| β(°)                                                                             | 111.508                  |
| X-ray source                                                                     | BNL-X29 <sup>b</sup>     |
| Wavelength (Å)                                                                   | 1.1                      |
| Resolution (Å)                                                                   | 30-2.00 (2.07-2.00)      |
| No. of reflection observed                                                       | 448,493                  |
| Unique                                                                           | 57,807(4,242)            |
| Completeness (%)                                                                 | 94.0 (69.0)              |
| <i>R</i> -merge                                                                  | 0.100 (0.518)            |
| <i>I</i> /σ <i>I</i>                                                             | 19.3                     |
| Multiplicity                                                                     | 7.8(5.1)                 |
| Refinement statistics                                                            |                          |
| Resolution range (Å)                                                             | 30.0–2.00 (2.05-2.00)    |
| <i>R</i> -work/ <i>R</i> -free (%)                                               | 20.5/25.2 (29.0/33.0)    |
| RMSD                                                                             |                          |
| Bond lengths                                                                     | 0.011                    |
| Bond angles                                                                      | 1.3                      |
| No. of atoms                                                                     |                          |
| Protein                                                                          | 5,736                    |
| Bisphosphonates                                                                  | 48                       |
| Magnesium ion                                                                    | 6                        |
| Solvent (water)                                                                  | 265                      |
| <i>B</i> average (Å <sup>2</sup> ) of protein                                    | 46.7                     |
| <i>B</i> average (Å <sup>2</sup> ) of solvents                                   | 47.79                    |
| <i>B</i> average (Å <sup>2</sup> ) of ligands(Bisphosphonates,Mg <sup>2+</sup> ) | 35.17                    |

<sup>a</sup>: BPH-722 is 2-(3-heptyloxy-pyridinium-1-yl)ethylidene-1,1-bisphosphonic acid

<sup>b</sup>: Brookhaven National Laboratory

**BPH-722**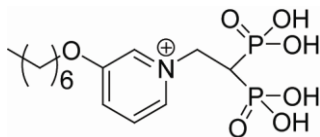

**Table S10:** Data collection and refinement statistics for BPH-714<sup>a</sup> bound to *T. brucei* FPPS (3EFQ).

|                                                                                  |                          |
|----------------------------------------------------------------------------------|--------------------------|
| <b>Crystals</b>                                                                  | 714 <sup>a</sup>         |
| <b>Data collection</b>                                                           |                          |
| Space group                                                                      | C2                       |
| Unit cell dimension (Å)                                                          |                          |
| <i>a</i> , <i>b</i> , <i>c</i> (Å)                                               | 132.961, 119.157, 63.040 |
| β(°)                                                                             | 111.383                  |
| X-ray source                                                                     | BNL-X29 <sup>b</sup>     |
| Wavelength (Å)                                                                   | 1.1                      |
| Resolution (Å)                                                                   | 30-2.00 (2.07-2.00)      |
| No. of reflection observed                                                       | 465,810                  |
| Unique                                                                           | 58,529(4,662)            |
| Completeness (%)                                                                 | 95.5 (75.8)              |
| <i>R</i> -merge                                                                  | 0.099 (0.443)            |
| <i>I</i> /σ <i>I</i>                                                             | 17.8                     |
| Multiplicity                                                                     | 8.0(5.2)                 |
| Refinement statistics                                                            |                          |
| Resolution range (Å)                                                             | 30.0–2.00 (2.05-2.00)    |
| <i>R</i> -work/ <i>R</i> -free (%)                                               | 21.1/24.8 (29.0/36.6)    |
| RMSD                                                                             |                          |
| Bond lengths                                                                     | 0.011                    |
| Bond angles                                                                      | 1.3                      |
| No. of atoms                                                                     |                          |
| Protein                                                                          | 5,736                    |
| Bisphosphonates                                                                  | 50                       |
| Magnesium ion                                                                    | 6                        |
| Solvent (water)                                                                  | 256                      |
| <b>B</b> average (Å <sup>2</sup> ) of protein                                    | 43.15                    |
| <b>B</b> average (Å <sup>2</sup> ) of solvents                                   | 44.54                    |
| <b>B</b> average (Å <sup>2</sup> ) of ligands(Bisphosphonates,Mg <sup>2+</sup> ) | 33.84                    |

<sup>a</sup>: BPH-714 is 2-(3-octyloxy-pyridinium-1-yl)ethylidene-1,1-bisphosphonic acid

<sup>b</sup>: Brookhaven National Laboratory

### BPH-714

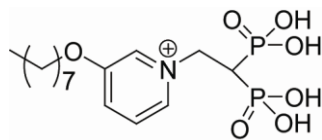

**Table S11:** Isothermal calorimetry results

| Cpd ID  | $\Delta H$<br>(kcal/mol) | $\Delta S$<br>(cal/deg/mol) | $\Delta G$<br>(kcal/mol) |
|---------|--------------------------|-----------------------------|--------------------------|
| BPH-527 | 3.93                     | 42.9                        | -8.9                     |
| BPH-536 | 4.01                     | 43.1                        | -8.6                     |
| BPH-540 | ~0                       |                             |                          |
| BPH-541 | ~0                       |                             |                          |
| BPH-560 | 3.78                     | 41.5                        | -8.5                     |
| BPH-571 | 2.49                     | 36.5                        | -8.3                     |
| BPH-678 | 1.85                     | 35.7                        | -8.7                     |

**Table S12:** Data collection and refinement statistics for BPH-715<sup>a</sup> bound to *S. cerevisiae*

GGPPS. (PDB: 2ZEU)

|                                                                    | BPH-715                                       |
|--------------------------------------------------------------------|-----------------------------------------------|
| <b>Data collection</b>                                             |                                               |
| Space group                                                        | P2 <sub>1</sub> 2 <sub>1</sub> 2 <sub>1</sub> |
| Unit cell dimension (Å)                                            |                                               |
| <i>a</i> , <i>b</i> , <i>c</i> (Å)                                 | 47.256 116.207 129.385                        |
| X-ray source                                                       | BL13B1 <sup>b</sup>                           |
| Wavelength (Å)                                                     | 1.0                                           |
| Resolution (Å)                                                     | 30-2.0 (2.07-2.0)                             |
| No. of reflection observed                                         | 376,311                                       |
| Unique                                                             | 48,744 (4,710)                                |
| Completeness (%)                                                   | 99.4 (99.7)                                   |
| <i>R</i> -merge                                                    | 0.047 (0.383)                                 |
| <i>I</i> / $\sigma$ <i>I</i>                                       | 41.7                                          |
| Multiplicity                                                       | 7.7 (7.3)                                     |
| Refinement statistics                                              |                                               |
| Resolution range (Å)                                               | 30-2.0                                        |
| <i>R</i> -work/ <i>R</i> -free (%)                                 | 18.92/23.61                                   |
| RMSD                                                               |                                               |
| Bond lengths                                                       | 0.018                                         |
| Bond angles                                                        | 1.642                                         |
| No. of atoms                                                       |                                               |
| Protein                                                            | 5025                                          |
| Ligand                                                             | 54                                            |
| Magnesium ion                                                      | 0                                             |
| Solvent (water)                                                    | 543                                           |
| <i>B</i> average (Å <sup>2</sup> ) of protein                      | 43.68                                         |
| <i>B</i> average (Å <sup>2</sup> ) of solvents                     | 58.32                                         |
| <i>B</i> average (Å <sup>2</sup> ) of ligands<br>(bisphosphonates) | 68.65                                         |

<sup>a</sup>: BPH-715 is 2-(3-decyloxy-pyridinium-1-yl)-1,1-bisphosphonic acid<sup>b</sup>: National Synchrotron Radiation Research Center (NSRRC, Hsinchu, Taiwan)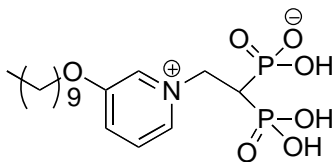**BPH-715**



**Table S13:** Data collection and refinement statistics for BPH-715<sup>a</sup> bound to *S. cerevisiae*

GGPPS. (PDB: 2ZEV)

|                                                | BPH-715 + IPP                                 |
|------------------------------------------------|-----------------------------------------------|
| <b>Data collection</b>                         |                                               |
| Space group                                    | P2 <sub>1</sub> 2 <sub>1</sub> 2 <sub>1</sub> |
| Unit cell dimension (Å)                        |                                               |
| <i>a</i> , <i>b</i> , <i>c</i> (Å)             | 47.822 115.879 128.336                        |
| X-ray source                                   | BL13B1 <sup>b</sup>                           |
| Wavelength (Å)                                 | 1.0                                           |
| Resolution (Å)                                 | 50-2.23 (2.31-2.23)                           |
| No. of reflection observed                     | 207,561                                       |
| Unique                                         | 33,587 (3,069)                                |
| Completeness (%)                               | 93.3 (86.6)                                   |
| <i>R</i> -merge                                | 0.039 (0.452)                                 |
| <i>I</i> / $\sigma$ <i>I</i>                   | 41.3                                          |
| Multiplicity                                   | 6.2 (5.4)                                     |
| Refinement statistics                          |                                               |
| Resolution range (Å)                           | 50.0–2.23                                     |
| <i>R</i> -work/ <i>R</i> -free (%)             | 19.99/26.55                                   |
| RMSD                                           |                                               |
| Bond lengths                                   | 0.016                                         |
| Bond angles                                    | 1.677                                         |
| No. of atoms                                   |                                               |
| Protein                                        | 4,887                                         |
| Ligand                                         | 68                                            |
| Magnesium ion                                  | 4                                             |
| Solvent (water)                                | 452                                           |
| <i>B</i> average (Å <sup>2</sup> ) of protein  | 46.42                                         |
| <i>B</i> average (Å <sup>2</sup> ) of solvents | 57.92                                         |
| <i>B</i> average (Å <sup>2</sup> ) of ligands  | 69.25                                         |
| (bisphosphonates, Mg <sup>2+</sup> , IPP)      |                                               |

<sup>a</sup>: BPH-715 is 2-(3-decyloxy-pyridinium-1-yl)-1,1-bisphosphonic acid

<sup>b</sup>: National Synchrotron Radiation Research Center (NSRRC, Hsinchu, Taiwan)

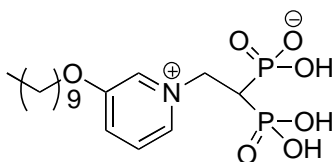**BPH-715**

## Supplementary Figures

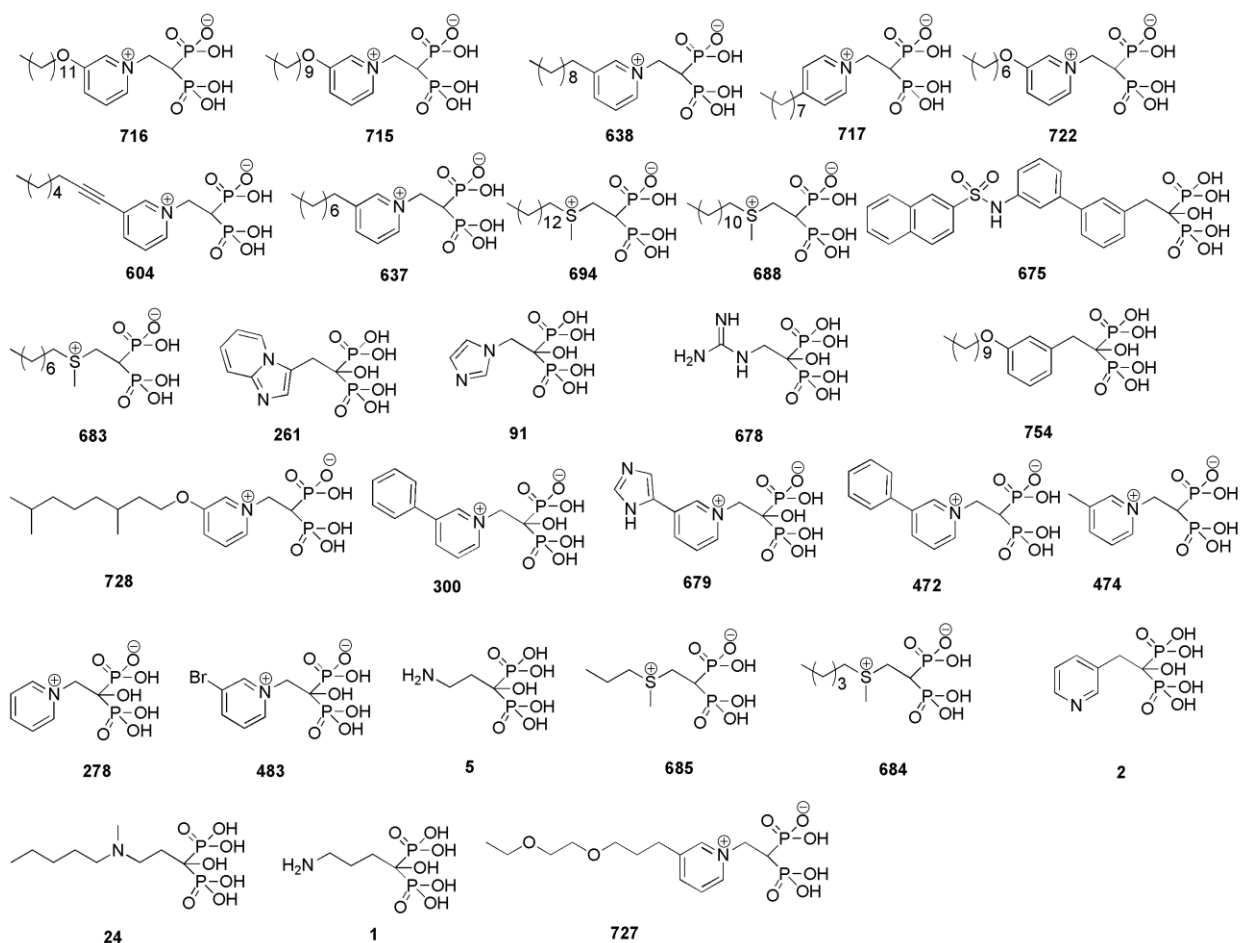

**Figure S1:** Structures of BPH-series of inhibitors investigated in cell growth inhibition, FPPS and GGPPS enzyme inhibition. Rank ordered in terms of decreasing potency in NCI-H460 cell growth inhibition (see Supporting Table S1).

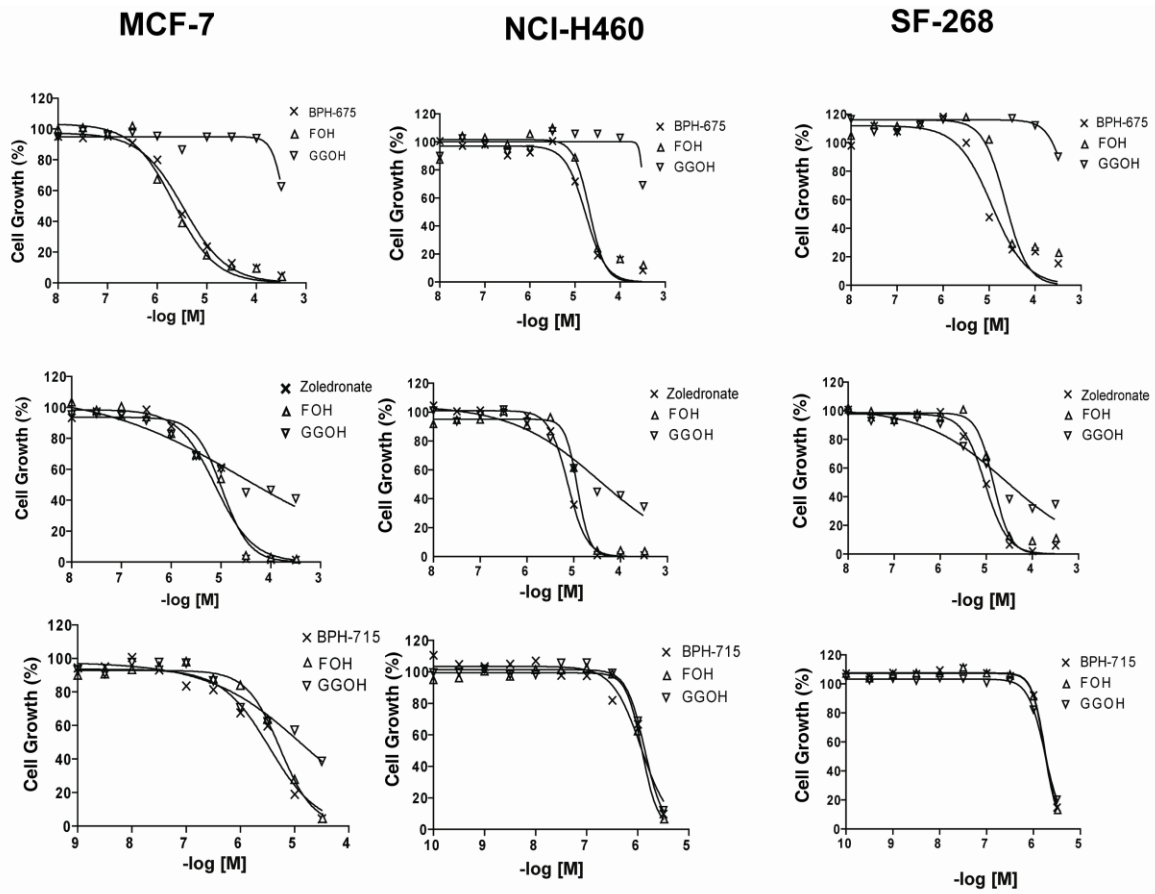

**Figure S2:** Rescue of cell growth inhibition for all three cell lines; BPH-675, zoledronate and BPH-715 inhibitors; 20  $\mu$ M FOH ( $\Delta$ ) or GGOH ( $\nabla$ ) concentrations.

## Supporting Experimental Information

### NMR sample preparation

*T. brucei* FPPS was expressed in BL21 (DE3) *E. coli* and purified as described previously<sup>1</sup>. Microcrystalline samples for solid state NMR were prepared by serially adding bisphosphonate, IPP and Mg<sup>2+</sup> in a ratio of 1:1:3. Typically, the starting FPPS protein concentration was between 10 to 20 mg/mL, and dilution during ligand addition was kept to a minimum. After incubating for 1-2 hrs, precipitation of crystalline protein<sup>2</sup> was induced by slowly adding first,  $\beta$ -mercaptoethanol (10 mM), then PEG-3350, to a maximum concentration of 20%. The solution was mixed gently and kept overnight until a white precipitate formed. The sample was transferred into a sealed 1 mL Eppendorf tube and then centrifuged at 3220g for 30 min and subsequently transferred into a 3.2 mm NMR rotor by centrifugation (3220g for 30 minutes). In some cases, precipitation was induced by adding Mg<sup>2+</sup> to 2:2:9 (though this was rare). Typically, microcrystals precipitated out at ~ 10% PEG; at 20% or more PEG, a gel formed that was difficult to pellet. It is best to start with high protein concentration of at least 500  $\mu$ M volume, and to use concentrated stock solutions of bisphosphonates, IPP, Mg<sup>2+</sup>, so that the protein solution is not diluted.

1. Mao, J.; Gao, Y.G.; Odeh, S.; Robinson, H.; Montalvetti, A.; Docampo, R.; Oldfield, E. *Acta Crystallogr D Biol Crystallogr* **2004**, *60*, 1863-6.

2. Martin, R.W.; Zilm, K.M. *J. Mag. Res.* **2003**, *165*, 162-174.

*Complete ref 5 from the article:*

(5) Gnant, M.; Mlineritsch, B.; Schippinger, W.; Luschin-Ebengreuth, G.; Postlberger, S.; Menzel, C.; Jakesz, R.; Seifert, M.; Hubalek, M.; Bjelic-Radisic, V.; Samonigg, H.; Tausch, C.; Eidtmann, H.; Steger, G.; Kwasny, W.; Dubsky, P.; Fridrik, M.; Fitzal, F.; Stierer, M.; Rucklinger, E.; Greil, R.; Marth, C. *N. Engl. J. Med.* **2009**, *360*, 679-91.
